# Supplementary material for: Analysis of the Oxidative Stress Regulon Identifies soxS as a Genetic Target for Resistance Reversal in Multidrug-Resistant Klebsiella pneumoniae
Source: PubMed Central journal article supplement (PMC8262902; doi:10.1128/mbio.00867-21), 2021-06-08
Supplement: mbio.00867-21-sf001.pdf [file mbio.00867-21-sf001.pdf]

## Supplementary figures

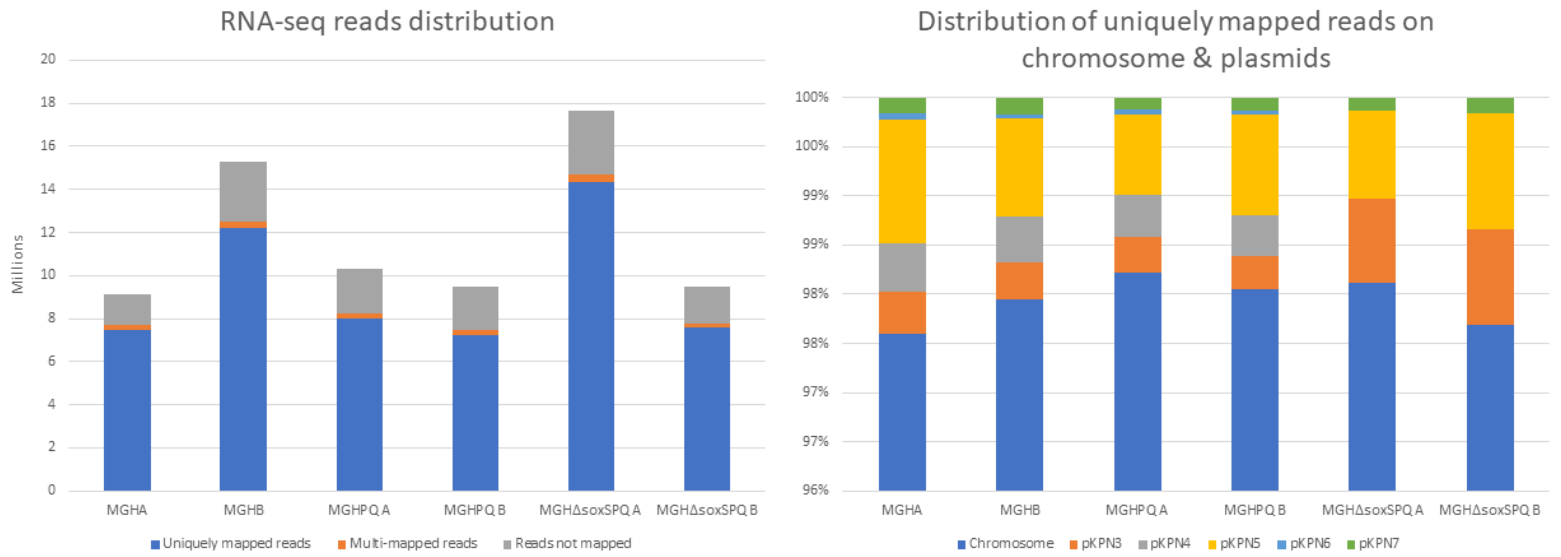

**Figure S1.** Distribution of RNA-seq reads in each individual dataset.
